# Supplementary material
Source: PubMed Central journal article supplement (PMC6153058)
Supplement: NIHMS974227-supplement-Supplemental_Digital_Content.pdf [file NIHMS974227-supplement-Supplemental_Digital_Content.pdf]

# OBSTETRICS & GYNECOLOGY



## CME for the Clinical Expert Series

### Moving Toward Individualized Medicine for Uterine Leiomyomas

*Shannon K. Laughlin-Tommaso, MD, MPH and Elizabeth A. Stewart, MD  
Obstet Gynecol 2018;132(3)*

**Continuing Medical Education credit is provided through joint providership with The American College of Obstetricians and Gynecologists.**

#### **File Available Online:**

[CME Quiz for “Moving Toward Individualized Medicine for Uterine Leiomyomas”](#)

*Please click this link to start the quiz.*

---

#### **ACCME Accreditation**

The American College of Obstetricians and Gynecologists is accredited by the Accreditation Council for Continuing Medical Education (ACCME) to provide continuing medical education for physicians.

#### **AMA PRA Category 1 Credit(s)<sup>TM</sup>**

The American College of Obstetricians and Gynecologists designates this **enduring material** for a maximum of 2 *AMA PRA Category 1 Credits<sup>TM</sup>*. Physicians should claim only the credit commensurate with the extent of their participation in the activity.

#### **College Cognate Credit(s)**

The American College of Obstetricians and Gynecologists designates this **enduring material** for a maximum of 2 Category 1 College Cognate Credits. The College has a reciprocity agreement with the AMA that allows *AMA PRA Category 1 Credits<sup>TM</sup>* to be equivalent to College Cognate Credits.

#### **Disclosure of Faculty and Planning Committee Industry Relationships**

In accordance with the College policy, all faculty and planning committee members have signed a conflict of interest statement in which they have disclosed any financial interests or other relationships with industry relative to article topics. Such disclosures allows the participant to evaluate better the objectivity of the information presented in the articles.

---

**Hardware/Software Requirements:** Desktop or laptop computer (Mac or PC) and an Internet browser.

**Access:** CME for the Clinical Expert Series is available to ACOG Fellows, only. The link above will take readers to ACOG.org, where they will be asked to log in using their ACOG (not Green Journal) user name and password.

**Policy on Privacy and Confidentiality:** The privacy policy for [www.greenjournal.org](http://www.greenjournal.org) is [available online](#). The privacy policy for [www.acog.org](http://www.acog.org) is [available online](#).

**Contact Information:** Questions related to transcripts may be directed to [educationcme@acog.org](mailto:educationcme@acog.org). For other queries, please contact the *Obstetrics & Gynecology* Editorial Office, 202-314-2317 or [obgyn@greenjournal.org](mailto:obgyn@greenjournal.org).
